# Supplementary material for: Expression of a Cryptic Secondary Sigma Factor Gene Unveils Natural Competence for DNA Transformation in Staphylococcus aureus
Source: PubMed Central journal article supplement (PMC3486894; doi:10.1371/journal.ppat.1003003), 2012-11-01
Supplement: ppat.1003003.s009.pdf [file ppat.1003003.s009.pdf]

## Table S1 Composition of CS2 medium

|                                                      | stock conc. | final conc. | 1000 ml |
|------------------------------------------------------|-------------|-------------|---------|
| <b>Sterile MilliQ water</b>                          |             |             | 710ml   |
| <b>Solution A</b>                                    |             |             | 100ml   |
| Na <sub>2</sub> HPO <sub>4</sub>                     | 71.4 g/L    |             |         |
| KH <sub>2</sub> PO <sub>4</sub>                      | 30 g/L      |             |         |
| (NH <sub>4</sub> ) <sub>2</sub> SO <sub>4</sub>      | 20 g/L      |             |         |
| <b>Solution B-1</b>                                  |             |             | 10 ml   |
| MgSO <sub>4</sub> · 7H <sub>2</sub> O                | 5 g/L       | 50 mg/L     |         |
| MnSO <sub>4</sub> · 5H <sub>2</sub> O                | 0.5418 g/L  | 5.4 mg/L    |         |
| <b>Solution B-2</b>                                  |             |             | 10 ml   |
| FeSO <sub>4</sub> · 7H <sub>2</sub> O                | 0.28 g/L    | 2.8 mg/L    |         |
| <b>Solution C</b>                                    |             |             | 25 ml   |
| 40% Glucose                                          | 40%(w/v)    | 1%          |         |
| <b>Solution D</b>                                    |             |             | 10 ml   |
| Biotin                                               | 10 mg/L     | 0.1 mg/L    |         |
| Nicotinic acid                                       | 200 mg/L    | 2 mg/L      |         |
| D-Panthenic acid                                     | 200 mg/L    | 2 mg/L      |         |
| Pyridoxine hydrochloride                             | 400 mg/L    | 4 mg/L      |         |
| Riboflavin                                           | 200 mg/L    | 2 mg/L      |         |
| Thiamine hydrochloride                               | 200 mg/L    | 2 mg/L      |         |
| <b>Adenine Solution</b>                              |             |             | 50 ml   |
| Adenine · 1/2H <sub>2</sub> SO <sub>4</sub>          | 300 mg/L    | 15mg/L      |         |
| <b>Guanine Solution*</b>                             |             |             | 50 ml   |
| Guanine                                              | 592 mg/L    | 30mg/L      |         |
| <b>Trace elements Solution</b>                       |             |             | 10 ml   |
| CaCl <sub>2</sub>                                    | 109.94 mg/L | **          |         |
| 1M ZnSO <sub>4</sub>                                 | 105.2 ul    | 0.17mg/L    |         |
| 100mM CuSO <sub>4</sub>                              | 504 ul      | 0.08mg/L    |         |
| CoCl <sub>2</sub> · 6H <sub>2</sub> O                | 12 mg/L     | 0.12mg/L    |         |
| Na <sub>2</sub> MoO <sub>4</sub> · 2H <sub>2</sub> O | 12 mg/L     | 0.12mg/L    |         |
| <b>Amino Acids Solution ***</b>                      |             |             | 20 ml   |
| <b>Glutamine Solution</b>                            |             |             | 10 ml   |
| L-Glutamine                                          | 29.2 g/L    | 0.29 g/L    |         |
| <b>Solution Ca</b>                                   |             |             | 0.14    |
| CaCl <sub>2</sub>                                    | 55.4987 g/L | 8.9mg/L**   |         |

\* in 0.05N NaOH

\*\* total

\*\*\* RPMI1640 amino acids solution (50X) (Sigma, R7131)
